# Supplementary material
Source: publisher site journal article supplement (http://www.kjim.org/upload/media/kjim-2016-293-suppl5.pdf)
Supplement: Supplementary file 1 [file kjim-2016-293-suppl5.pdf]

**Supplementary Table 5. Univariate analysis for OS and PFS in HER2-negative and -positive by the Kaplan-Meier method**

| Variable                         | OS, mon,<br>median ± SD | 95% CI, mon | p value | PFS, mon,<br>median ± SD | 95% CI, mon | p value |
|----------------------------------|-------------------------|-------------|---------|--------------------------|-------------|---------|
| <b>HER2-negative<sup>a</sup></b> |                         |             |         |                          |             |         |
| Prechemotherapy NLR              |                         |             | 0.002   |                          |             | 0.006   |
| ≤ 3.0                            | 12.13 ± 0.88            | 10.40–13.87 |         | 6.53 ± 0.70              | 5.16–7.91   |         |
| > 3.0                            | 9.30 ± 0.78             | 7.77–10.83  |         | 4.43 ± 0.91              | 2.66–6.20   |         |
| <b>HER2-positive<sup>b</sup></b> |                         |             |         |                          |             |         |
| Prechemotherapy NLR              |                         |             | 0.105   |                          |             | 0.450   |
| ≤ 3.0                            | 15.73 ± 1.65            | 12.51–18.96 |         | 8.73 ± 1.11              | 6.55–10.91  |         |
| > 3.0                            | 13.53 ± 3.56            | 6.55–20.52  |         | 6.20 ± 3.02              | 0.29–12.11  |         |

OS, overall survival; PFS, progression-free survival; HER, human epidermal growth factor receptor; SD, standard deviation; CI, confidence interval; NLR, neutrophil-to-lymphocyte ratio.

<sup>a</sup>There were 161 HER2-negative patients. Among them 109 patients were NLR ≤ 3.0 (102 patients died) and 52 patients were > 3.0 (48 patients died).

<sup>b</sup>There were 32 HER2-positive patients. Among them 19 patients were NLR ≤ 3.0 (18 patients died) and 13 patients were NLR > 3.0 (11 patients died).
